# Supplementary material for: Suppression of chikungunya virus replication and differential innate responses of human peripheral blood mononuclear cells during co-infection with dengue virus
Source: PubMed Central journal article supplement (PMC5500378; doi:10.1371/journal.pntd.0005712), 2017-06-23

### IFN- $\alpha$

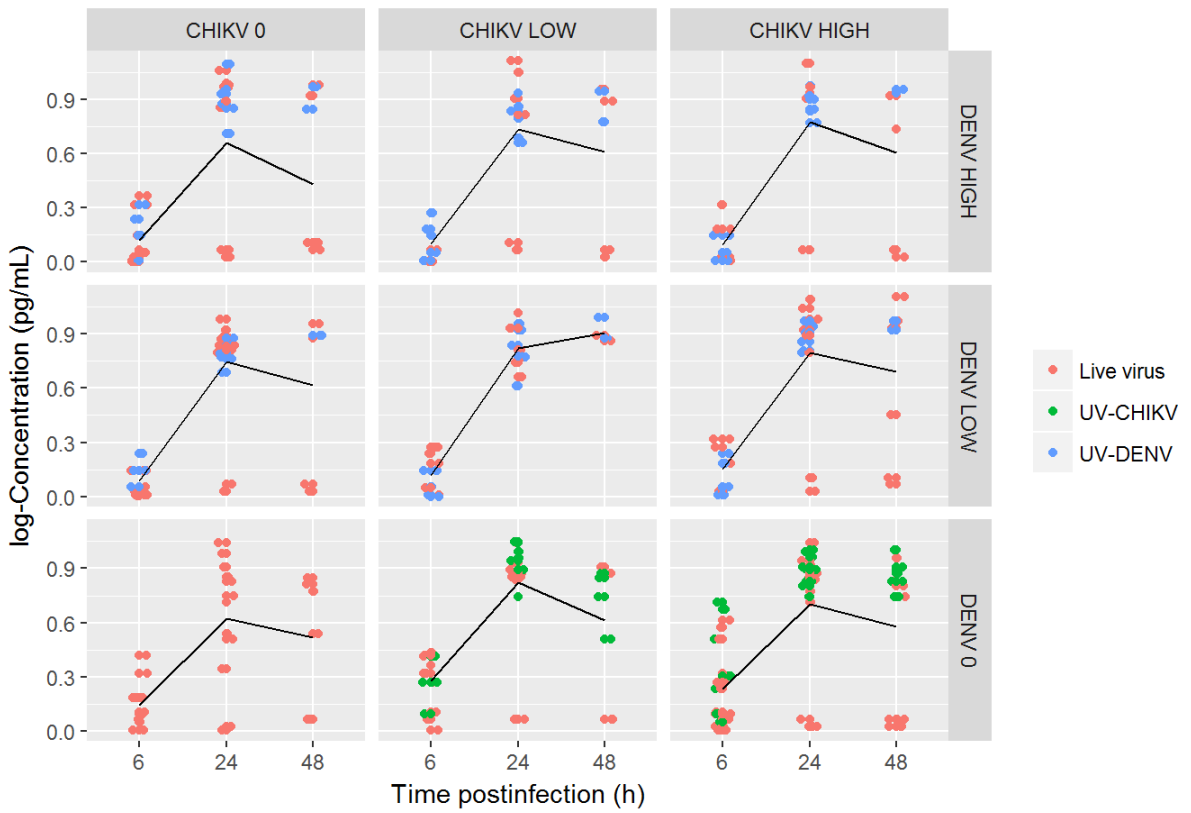

### IFN- $\beta$

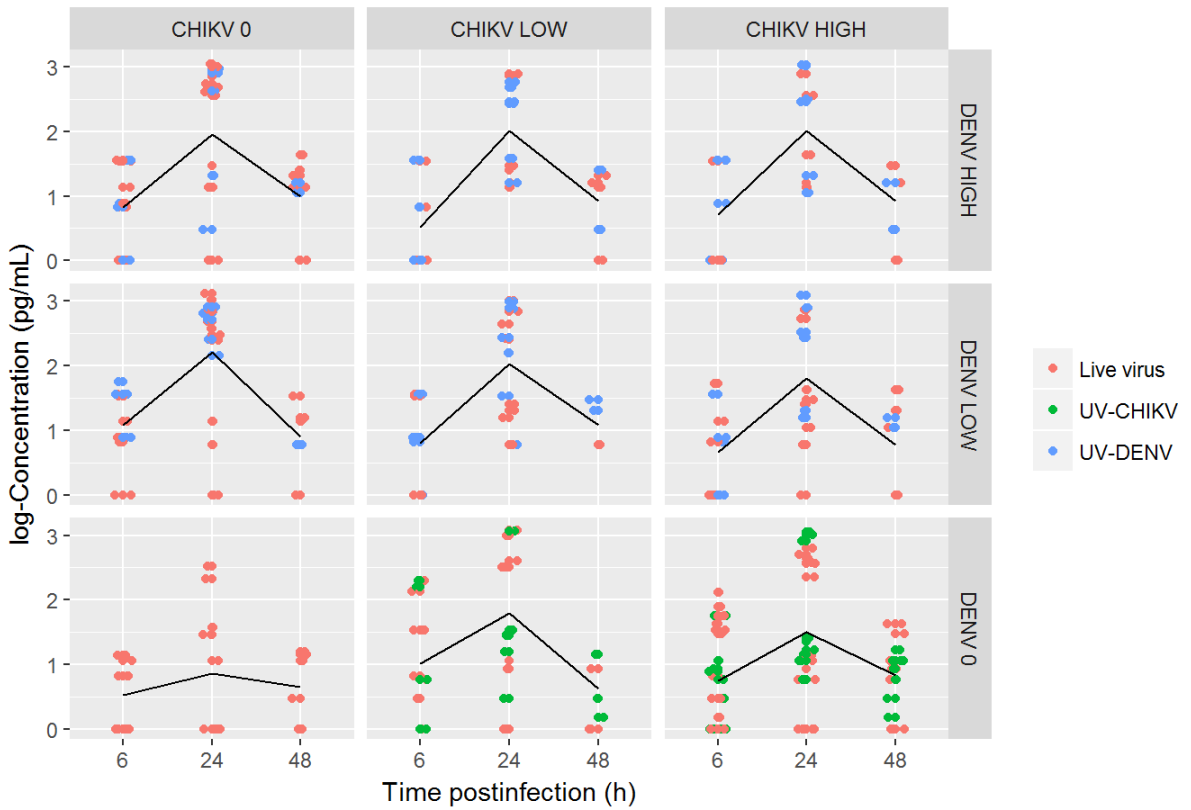

# IFN- $\omega$

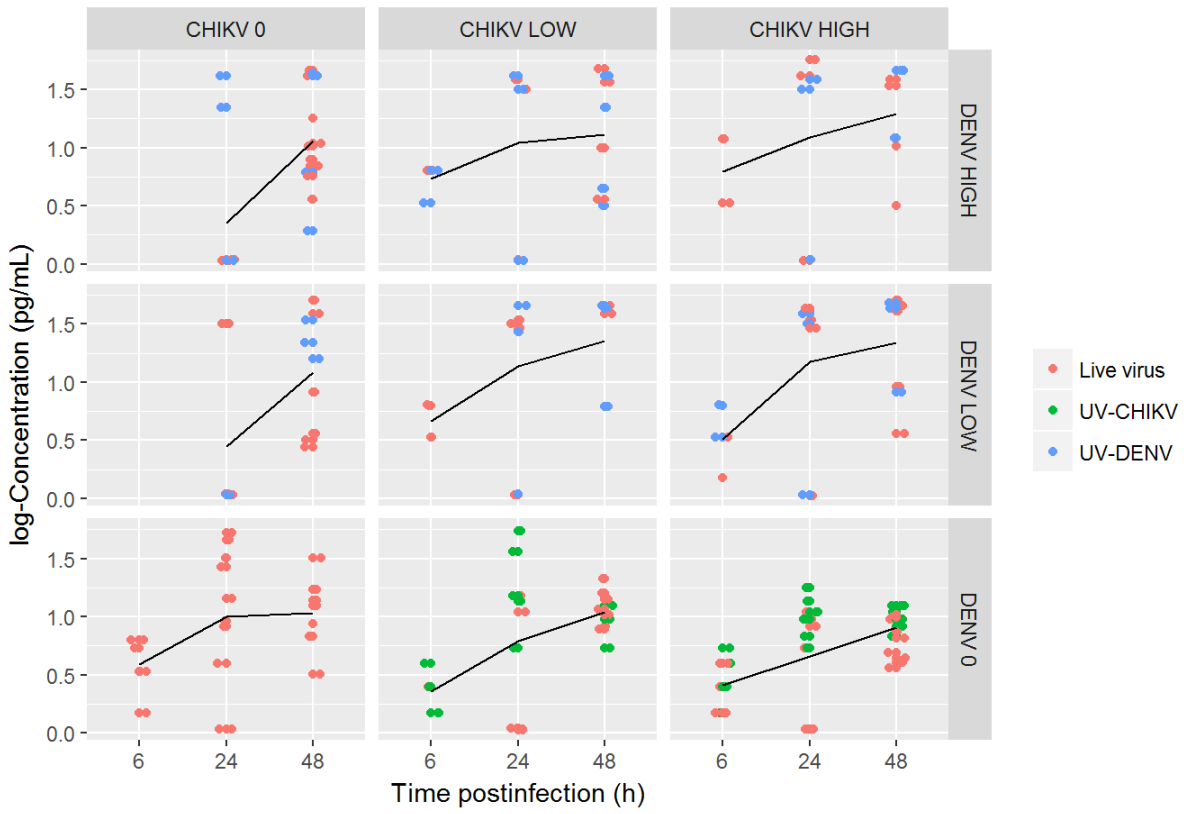

# IL-6

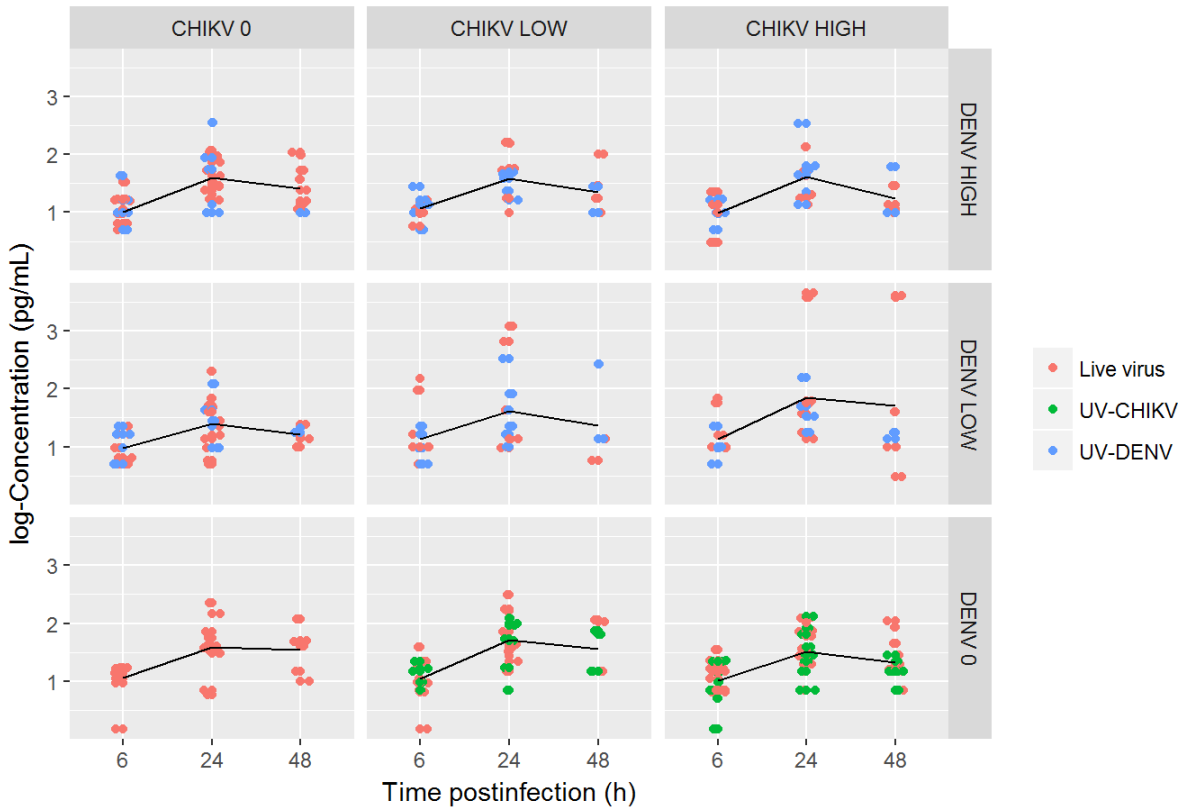

# IL-8

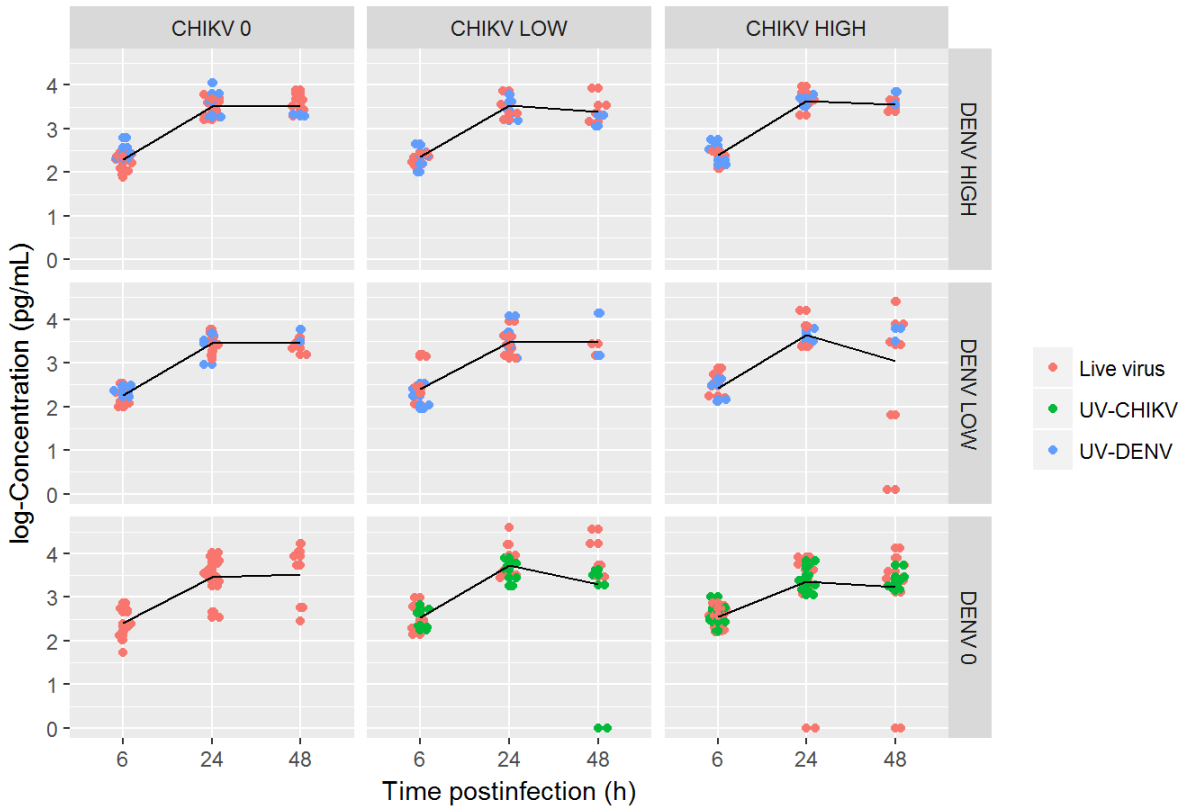

# IP-10

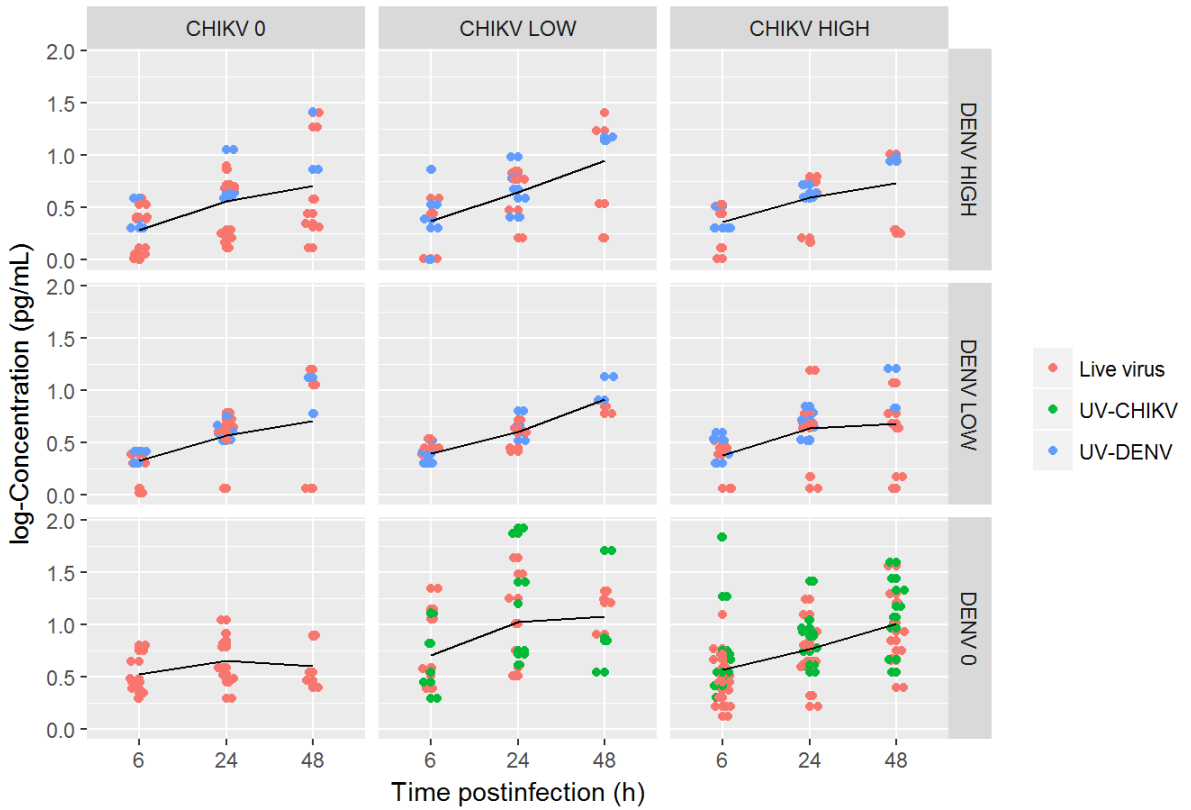

## MCP-1

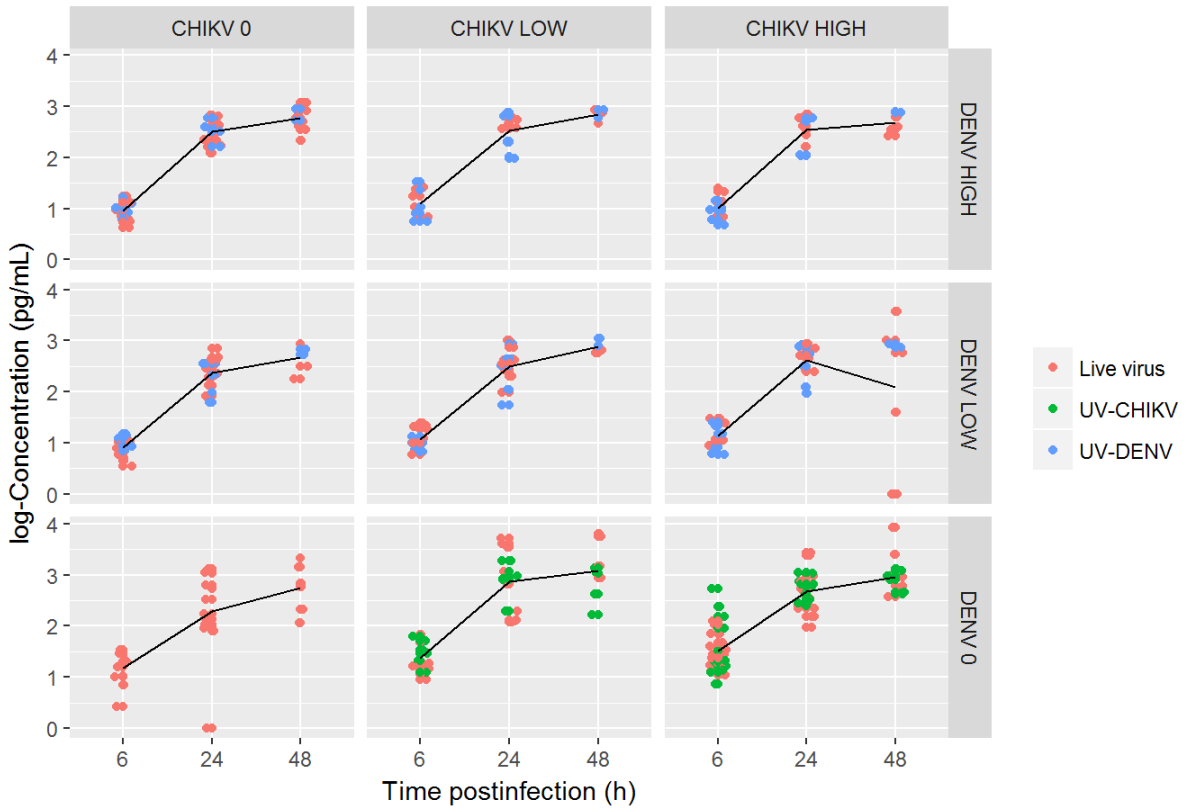

## TNF- $\alpha$

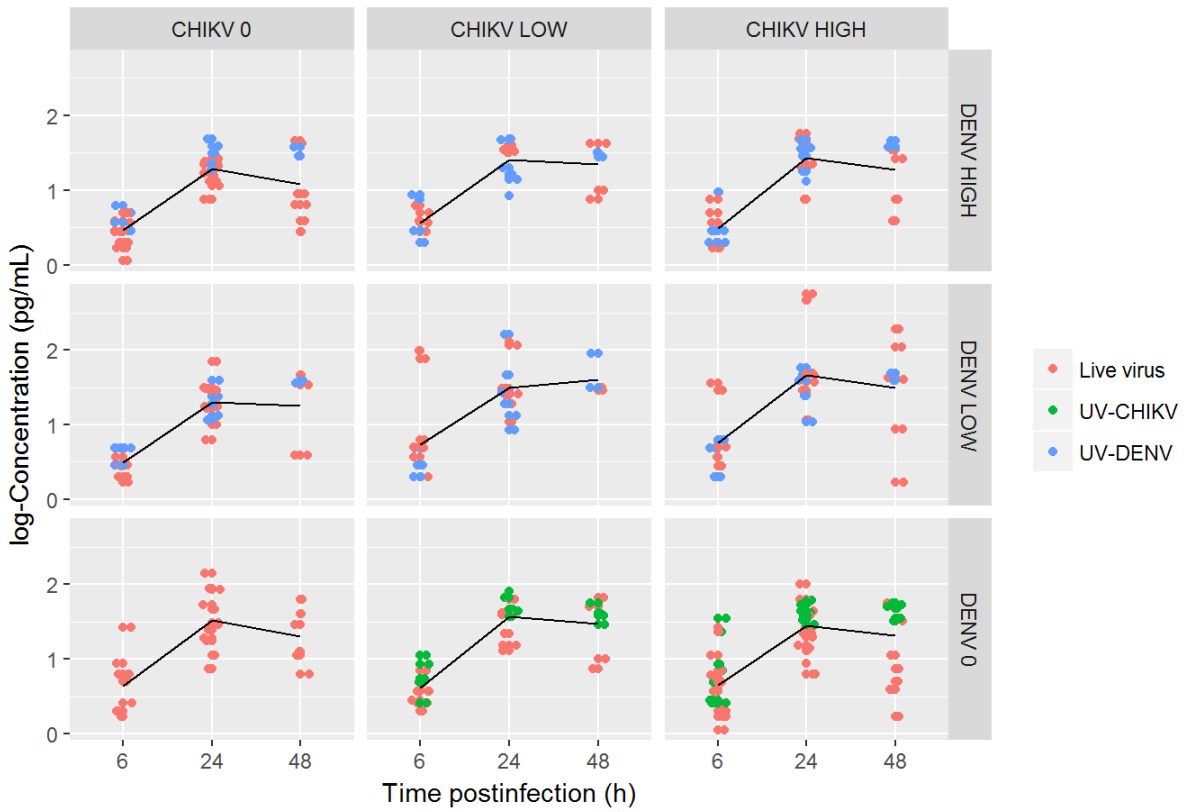

Supplement: pntd.0005712.s004.pdf [file pntd.0005712.s004.pdf]
